# Supplementary material for: Modeling NK-cell lymphoma in mice reveals its cell-of-origin and microenvironmental changes and identifies therapeutic targets
Source: PubMed Central journal article supplement — Nat Commun. 2024 Oct 22;15:9106. doi: 10.1038/s41467-024-53376-1 (PMC11496546; doi:10.1038/s41467-024-53376-1), 2024-10-22
Supplement: 41467_2024_53376_MOESM1_ESM.pdf [file 41467_2024_53376_MOESM1_ESM.pdf]

## 1 **Supplementary information**

### 2 **Modeling NK-cell lymphoma in mice reveals its cell-of-origin and microenvironmental** 3 **changes and identifies therapeutic targets**

4

5 Junji Koya<sup>1,2,20</sup>, Tomohiko Tanigawa<sup>1,2,20</sup>, Kota Mizuno<sup>1,2</sup>, Haryoon Kim<sup>1,2</sup>, Yuta Ito<sup>1,3</sup>,  
6 Mitsuhiro Yuasa<sup>1,4</sup>, Kentaro Yamaguchi<sup>1,2</sup>, Yasunori Kogure<sup>1</sup>, Yuki Saito<sup>1,5</sup>, Sumito Shingaki<sup>1</sup>,  
7 Mariko Tabata<sup>1,6</sup>, Koichi Murakami<sup>1,2</sup>, Kenichi Chiba<sup>7</sup>, Ai Okada<sup>7</sup>, Yuichi Shiraishi<sup>7</sup>, Amira  
8 Marouf<sup>8</sup>, Raphaël Liévin<sup>8</sup>, Sammara Chaubard<sup>9</sup>, Arnaud Jaccard<sup>9</sup>, Olivier Hermine<sup>8,10</sup>,  
9 Laurence de Leval<sup>11</sup>, Olivier Tournilhac<sup>12</sup>, Gandhi Damaj<sup>13</sup>, Philippe Gaulard<sup>14,15</sup>, Lucile  
10 Couronné<sup>8,16</sup>, Teruhito Yasui<sup>17,18</sup>, Kazutaka Nakashima<sup>19</sup>, Hiroaki Miyoshi<sup>19</sup>, Koichi  
11 Ohshima<sup>19</sup>, and Keisuke Kataoka<sup>1,2\*</sup>

12

- 13 1. Division of Molecular Oncology, National Cancer Center Research Institute, Tokyo,  
14 Japan.
- 15 2. Division of Hematology, Department of Medicine, Keio University School of Medicine,  
16 Tokyo, Japan.
- 17 3. Division of Clinical Oncology and Hematology, Department of Internal Medicine, The  
18 Jikei University School of Medicine, Tokyo, Japan.
- 19 4. Department of Pathology, Graduate School of Medicine, The University of Tokyo, Tokyo,  
20 Japan.
- 21 5. Department of Gastroenterology, Keio University School of Medicine, Tokyo, Japan.
- 22 6. Department of Urology, Graduate School of Medicine, The University of Tokyo, Tokyo,  
23 Japan.
- 24 7. Division of Genome Analysis Platform Development, National Cancer Center Research  
25 Institute, Tokyo, Japan.

- 26 8. Laboratory of cellular and molecular mechanisms of hematological disorders and  
27 therapeutic implications, INSERM UMR\_S 1163, Imagine Institute, Université Paris Cité,  
28 Paris, France.
- 29 9. Hematology department, Limoges University Hospital, Limoges, France.
- 30 10. Hematology Department, Necker Children's Hospital, Assistance Publique - Hôpitaux de  
31 Paris (APHP), Paris, France.
- 32 11. Institute of Pathology, Department of Laboratory Medicine and Pathology, Lausanne  
33 University Hospital and Lausanne University, Lausanne, Switzerland.
- 34 12. Department of Hematology, Clermont-Ferrand University Hospital, Clermont Auvergne  
35 University, Clermont-Ferrand, France.
- 36 13. Department of Hematology, Caen University Hospital, Normandy University, Caen,  
37 France.
- 38 14. University Paris Est Créteil, INSERMU955, IMRB, Créteil, France.
- 39 15. Pathology Department, Henri Mondor University Hospital, Assistance Publique -  
40 Hôpitaux de Paris (APHP), Créteil, France.
- 41 16. Laboratory of Onco-Hematology, Necker Children's Hospital, Assistance Publique -  
42 Hôpitaux de Paris (APHP), Paris, France.
- 43 17. Laboratory of Infectious Diseases and Immunity, Microbial Research Center for Health  
44 and Medicine, National Institutes of Biomedical Innovation, Health, and Nutrition, Ibaraki  
45 city, Japan.
- 46 18. Division of Molecular Psychoneuroimmunology, Institute for Genetic Medicine, Hokkaido  
47 University, Sapporo, Japan
- 48 19. Division of Pathology, Kurume University, Fukuoka, Japan.
- 49 20. These authors contributed equally as co-first authors: Junji Koya and Tomohiko  
50 Tanigawa

51

52 \*Corresponding authors: Keisuke Kataoka ([kkataoka-ky@umin.ac.jp](mailto:kkataoka-ky@umin.ac.jp))

53 **Supplementary Figures and legends**

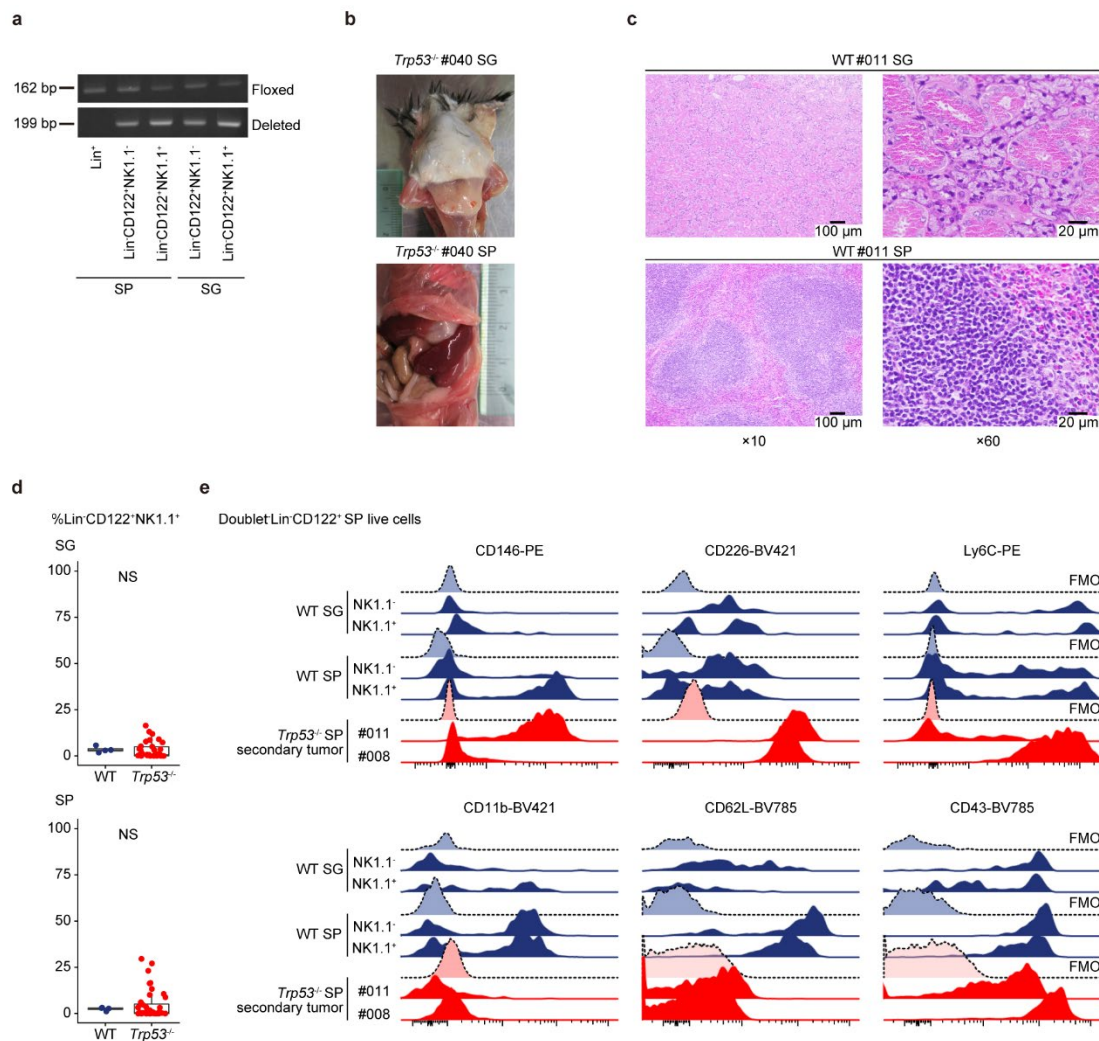

54

55 **Supplementary Fig. 1. *Trp53* disruption induces NK-cell lymphomas after long latency.**

56 **a**, PCR detection of the *Trp53* deletion in Lin (Gr1, Ter119, CD19, and CD3)<sup>+</sup> cells as well as  
57 Lin<sup>-</sup>CD122<sup>+</sup>NK1.1<sup>+</sup> and Lin<sup>-</sup>CD122<sup>+</sup>NK1.1<sup>+</sup> NK cells in SP and SG.

58 **b**, Representative images of gross appearance of *Trp53*<sup>-/-</sup> tumors in SG and SP.

59 **c**, Representative image of hematoxylin and eosin staining of SG and SP from WT (at 8 weeks  
60 old) mice.

61 **d**, Proportion of Lin<sup>-</sup>CD122<sup>+</sup>NK1.1<sup>+</sup> cells in SG and SP from WT (n = 4 at 60 weeks old) and  
62 *Trp53*<sup>-/-</sup> (n = 40 at tumor onset) mice. Box plots show medians (lines), IQRs (boxes), and ±  
63 1.5 × IQR (whiskers). NS: not significant, two-sided Welch's t-test. Source data are  
64 provided as a Source Data file.

65 **e**, Representative histograms of CD146, CD226, Ly6C, CD11b, CD62L and CD43 expression  
66 in Lin<sup>-</sup>CD122<sup>+</sup>NK1.1<sup>-</sup> and Lin<sup>-</sup>CD122<sup>+</sup>NK1.1<sup>+</sup> cells in SG and SP from WT mice (at 8 weeks  
67 old) and *Trp53*<sup>-/-</sup> secondary tumors in SP. Fluorescence minus one (FMO) controls are  
68 shown as shaded histograms.  
69

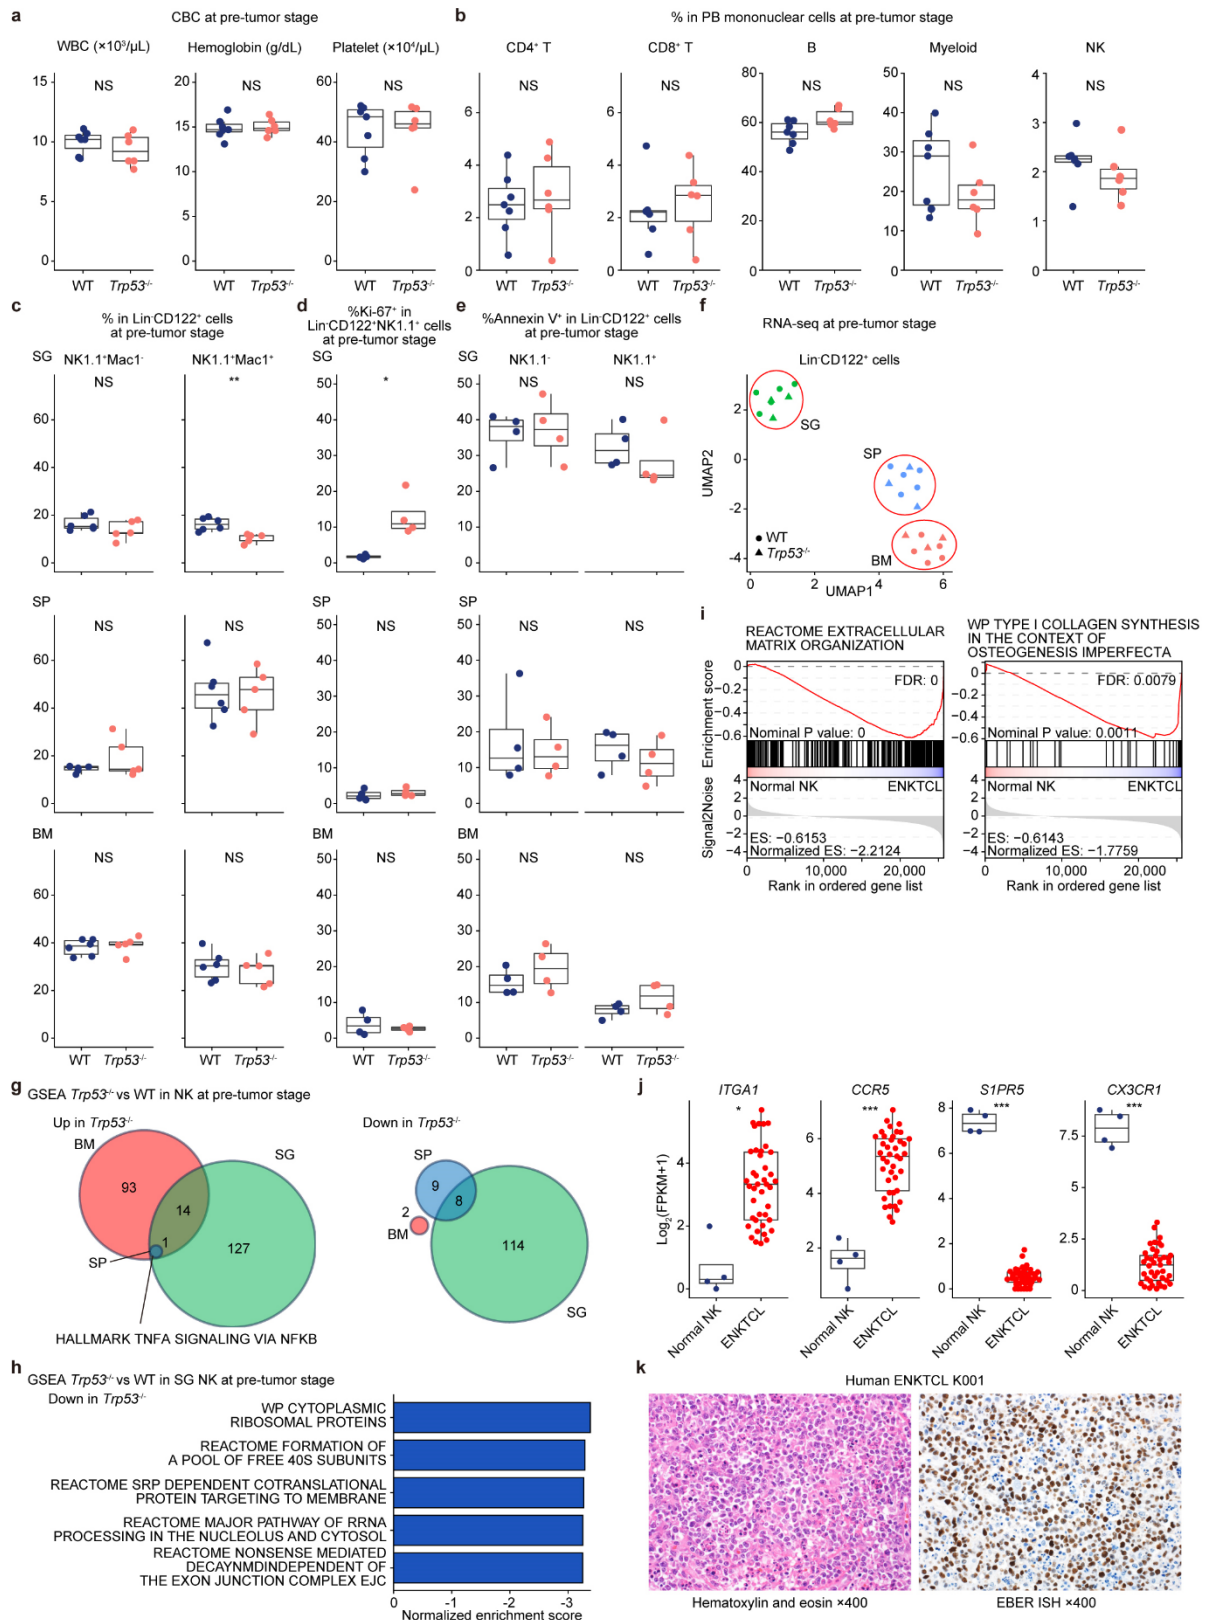

70

71

72 **Supplementary Fig. 2. Differential phenotypes of *Trp53*<sup>-/-</sup> NK cells at the pre-tumor stage**  
73 **across tissues.**

74 **a**, CBC in PB of WT (n = 7) and *Trp53*<sup>-/-</sup> (n = 6) mice (at 8 weeks old).

75 **b**, Proportion of CD4<sup>+</sup> T, CD8<sup>+</sup> T, B, myeloid, and NK cells in PB from WT (n = 7) and *Trp53*<sup>-/-</sup>  
76 (n = 6) mice (at 8 weeks old).

77 **c**, Proportion of NK1.1<sup>+</sup>Mac1<sup>-</sup> and NK1.1<sup>+</sup>Mac1<sup>+</sup> cells in Lin<sup>-</sup>CD122<sup>+</sup> cells in SG, SP, and BM  
78 from WT (n = 6) and *Trp53*<sup>-/-</sup> (n = 5) mice (at 8 weeks old).

79 **d**, Proportion of Ki-67<sup>+</sup> cells in Lin<sup>-</sup>CD122<sup>+</sup>NK1.1<sup>+</sup> cells in SG, SP, and BM from WT (n = 4)  
80 and *Trp53*<sup>-/-</sup> (n = 4) mice (at 8 weeks old).

81 **e**, Proportion of Annexin V<sup>+</sup> cells in Lin<sup>-</sup>CD122<sup>+</sup>NK1.1<sup>-</sup> and Lin<sup>-</sup>CD122<sup>+</sup>NK1.1<sup>+</sup> cells in SG, SP,  
82 and BM from WT (n = 4) and *Trp53*<sup>-/-</sup> (n = 4) mice at the pre-tumor stage (at 8 weeks).

83 **f**, UMAP (uniform manifold approximation and projection) plot of RNA-seq expression data of  
84 sorted Lin<sup>-</sup>CD122<sup>+</sup> NK cells in SG, SP, and BM from WT (circle, n = 5) and *Trp53*<sup>-/-</sup> (triangle,  
85 n = 3) mice (at 8 weeks old).

86 **g**, GSEA analysis of expression data comparing WT (n = 5 each for SG, SP, and BM) and  
87 *Trp53*<sup>-/-</sup> (n = 3 each for SG, SP, and BM) Lin<sup>-</sup>CD122<sup>+</sup> NK cells across SG, SP, and BM (at 8  
88 weeks old). Venn diagrams depict the overlap of upregulated (left) and downregulated  
89 signatures (right). Signatures with FDR < 0.25 are considered significant.

90 **h**, The top five downregulated signatures in GSEA analysis of expression data comparing WT  
91 (n = 5) and *Trp53*<sup>-/-</sup> (n = 3) Lin<sup>-</sup>CD122<sup>+</sup> NK cells in SG (at 8 weeks old).

92 **i**, Significant enrichment of extracellular matrix-associated signatures in GSEA analysis of  
93 expression data comparing human normal NK cells (n = 4) and ENKTCL tumors (n = 41).

94 **j**, Expression of genes associated with tissue-resident (*ITGA1* and *CCR5*) and circulating  
95 (*S1PR5* and *CX3CR1*) NK cells in human normal NK cells (n = 4) and ENKTCL tumors (n =  
96 41) by RNA-seq.

97 **k**, Representative image of hematoxylin and eosin staining (left) and EBV-encoded small RNA  
98 (EBER) in situ hybridization (right) in a human ENKTCL sample.

99 **a-e, and j**, Box plots show medians (lines), IQRs (boxes), and  $\pm 1.5 \times$  IQR (whiskers). NS:  
100 not significant, \*P < 0.05, \*\*P < 0.005, \*\*\*P < 0.0005, two-sided Welch's t-test. Source data  
101 are provided as a Source Data file.  
102

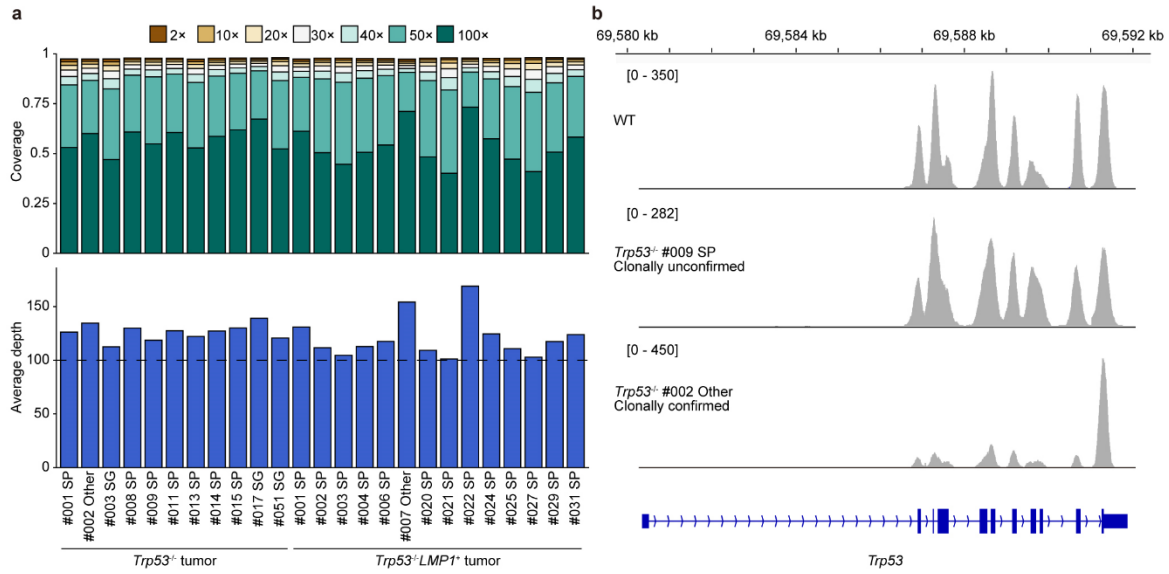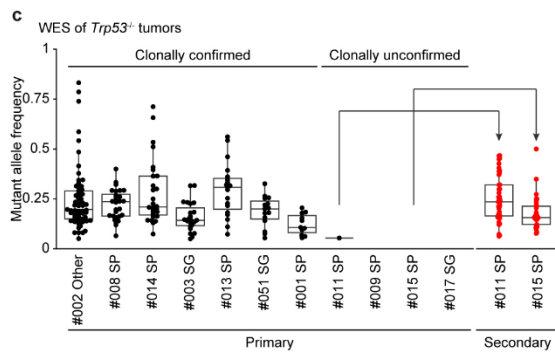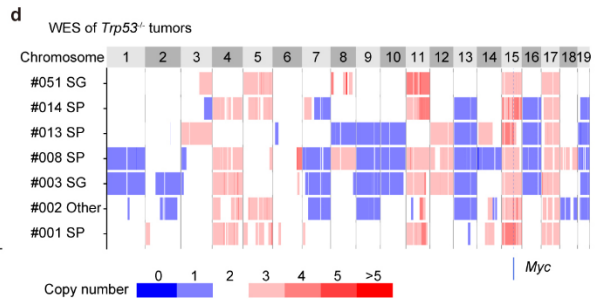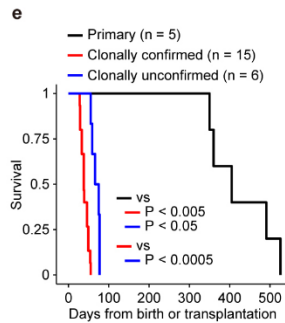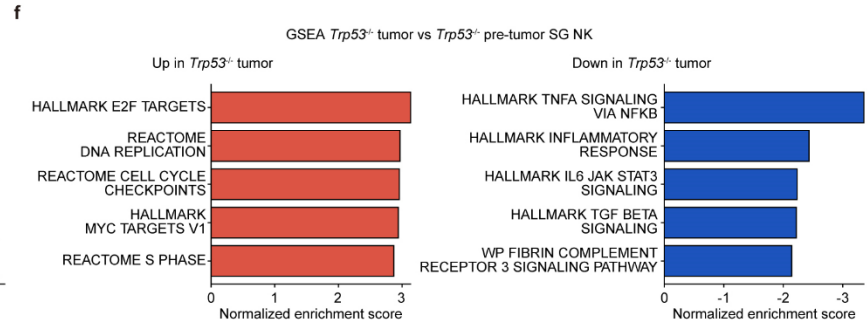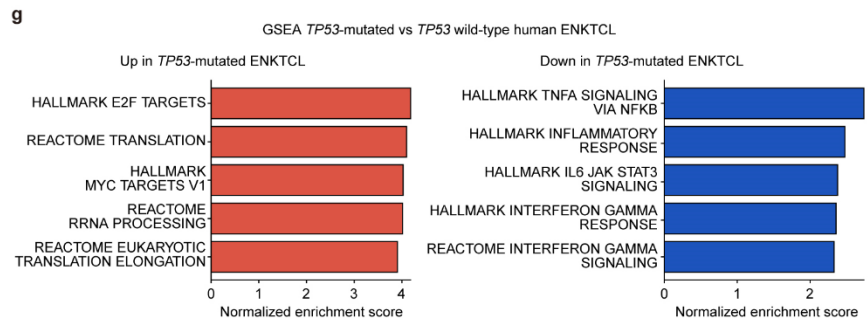

103

104



105 **Supplementary Fig. 3. Genomic and transcriptomic characterization of NK-cell tumors.**

106 **a**, The percentage of targeted bases covered by at least 2×, 10×, 20×, 30×, 40×, 50×, and  
107 100× sequencing reads (top) and average read depth (bottom) are shown for a total of 25  
108 WES samples.

109 **b**, Detection of *Trp53* deletion targeting exons 3–11 in clonally confirmed *Trp53*<sup>-/-</sup> tumors.  
110 WES read depths are visualized by IGV.

111 **c**, Hierarchy of somatic mutations with allele frequencies in *Trp53*<sup>-/-</sup> tumors (n = 13) detected  
112 by WES. Clonality is considered confirmed if > 3 somatic mutations are detected. 11  
113 primary tumors and 2 secondary tumors transplanted from clonally unconfirmed tumors are  
114 shown. Box plots show medians (lines), IQRs (boxes), and ± 1.5 × IQR (whiskers).

115 **d**, Heatmap showing somatic CNA segments in each sample (vertical axis) plotted by  
116 chromosomal location (horizontal vertical axis) in *Trp53*<sup>-/-</sup> clonally confirmed tumors (n = 7).

117 **e**, Kaplan-Meier survival curves of secondary mice (n = 21) transplanted with 1×10<sup>6</sup> clonally  
118 confirmed (n = 15) and unconfirmed (n = 6) *Trp53*<sup>-/-</sup> tumor cells compared with the  
119 corresponding primary mice. (n = 5). Data are the same as in **Fig. 1h**. Log-rank test.

120 **f**, GSEA analysis of expression data comparing *Trp53*<sup>-/-</sup> tumors (n = 4) and *Trp53*<sup>-/-</sup> Lin<sup>-</sup>CD122<sup>+</sup>  
121 NK cells in SG (n = 3 at 8 weeks old).

122 **g**, GSEA analysis of expression data comparing human *TP53* WT (n = 18) and *TP53*-mutated  
123 (n = 2) ENKTCL tumors.

124 **f, g**, Top five upregulated and downregulated signatures are shown. Signatures with FDR <  
125 0.25 are considered significant.

126 **c, e**, Source data are provided as a Source Data file.

127

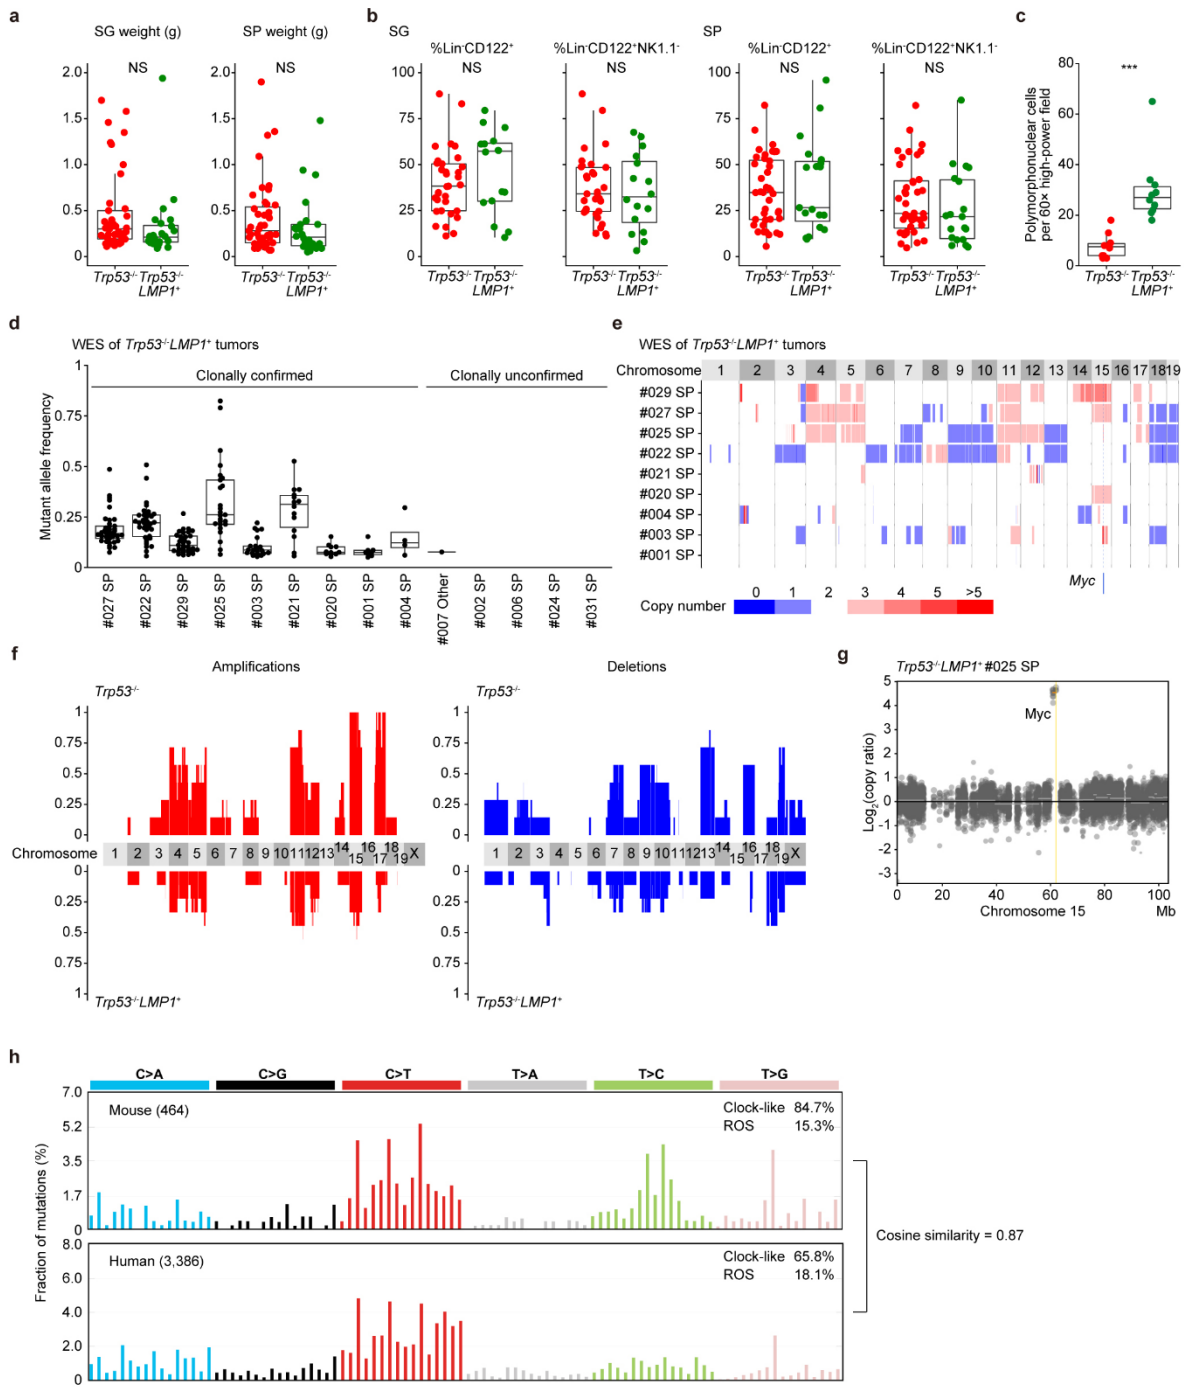

128

129

130 **Supplementary Fig. 4. Phenotypic and genetic characteristics of *Trp53*<sup>-/-</sup>*LMP1*<sup>+</sup> tumors.**

131 **a**, SG and SP weights of *Trp53*<sup>-/-</sup> (n = 41) and *Trp53*<sup>-/-</sup>*LMP1*<sup>+</sup> (n = 24) mice (at tumor onset).

132 *Trp53*<sup>-/-</sup> data are the same as in **Fig. 1c**.

133 **b**, Proportion of Lin<sup>-</sup>, Lin<sup>-</sup>CD122<sup>+</sup>, and Lin<sup>-</sup>CD122<sup>+</sup>NK1.1<sup>-</sup> cells in SG and SP from *Trp53*<sup>-/-</sup> (n =

134 40) and *Trp53*<sup>-/-</sup>*LMP1*<sup>+</sup> (n = 19) mice (at tumor onset). *Trp53*<sup>-/-</sup> data are the same as in **Fig.**

135 **1g**.

136 **c**, Number of polymorphonuclear cells per 60× high-power field in hematoxylin and eosin-

137 stained sections of *Trp53*<sup>-/-</sup> and *Trp53*<sup>-/-</sup>*LMP1*<sup>+</sup> tumors in SP. Five randomly chosen fields

138 from each of two mice were examined per genotype.

139 **d**, Hierarchy of somatic mutations with allele frequencies in *Trp53*<sup>-/-</sup>*LMP1*<sup>+</sup> tumors (n = 14)

140 detected by WES.

141 **e**, Heatmap showing somatic CNA segments in each sample (vertical axis) plotted by

142 chromosomal location (horizontal axis) in *Trp53*<sup>-/-</sup>*LMP1*<sup>+</sup> clonally confirmed tumors (n = 9).

143 **f**, Frequencies of copy number amplifications and deletions across the genome in *Trp53*<sup>-/-</sup> (n

144 = 7) and *Trp53*<sup>-/-</sup>*LMP1*<sup>+</sup> clonally confirmed tumors (n = 9).

145 **g**, *Myc* amplification in a representative *Trp53*<sup>-/-</sup>*LMP1*<sup>+</sup> tumor (#025 SP)

146 **h**, De novo mutational signatures extracted from 464 mutations in 25 mouse NK-cell tumors

147 (11 *Trp53*<sup>-/-</sup> and 14 *Trp53*<sup>-/-</sup>*LMP1*<sup>+</sup> tumors) and 3,386 mutations in 66 human ENKTCL

148 samples<sup>1</sup> detected by WES. Known related etiologies are noted. Cosine similarities

149 between mouse and human de novo signatures are shown.

150 **a-d**, Box plots show medians (lines), IQRs (boxes), and ± 1.5 × IQR (whiskers). NS: not

151 significant, \*\*\*P < 0.0005, two-sided Welch's t-test. Source data are provided as a Source

152 Data file.

153

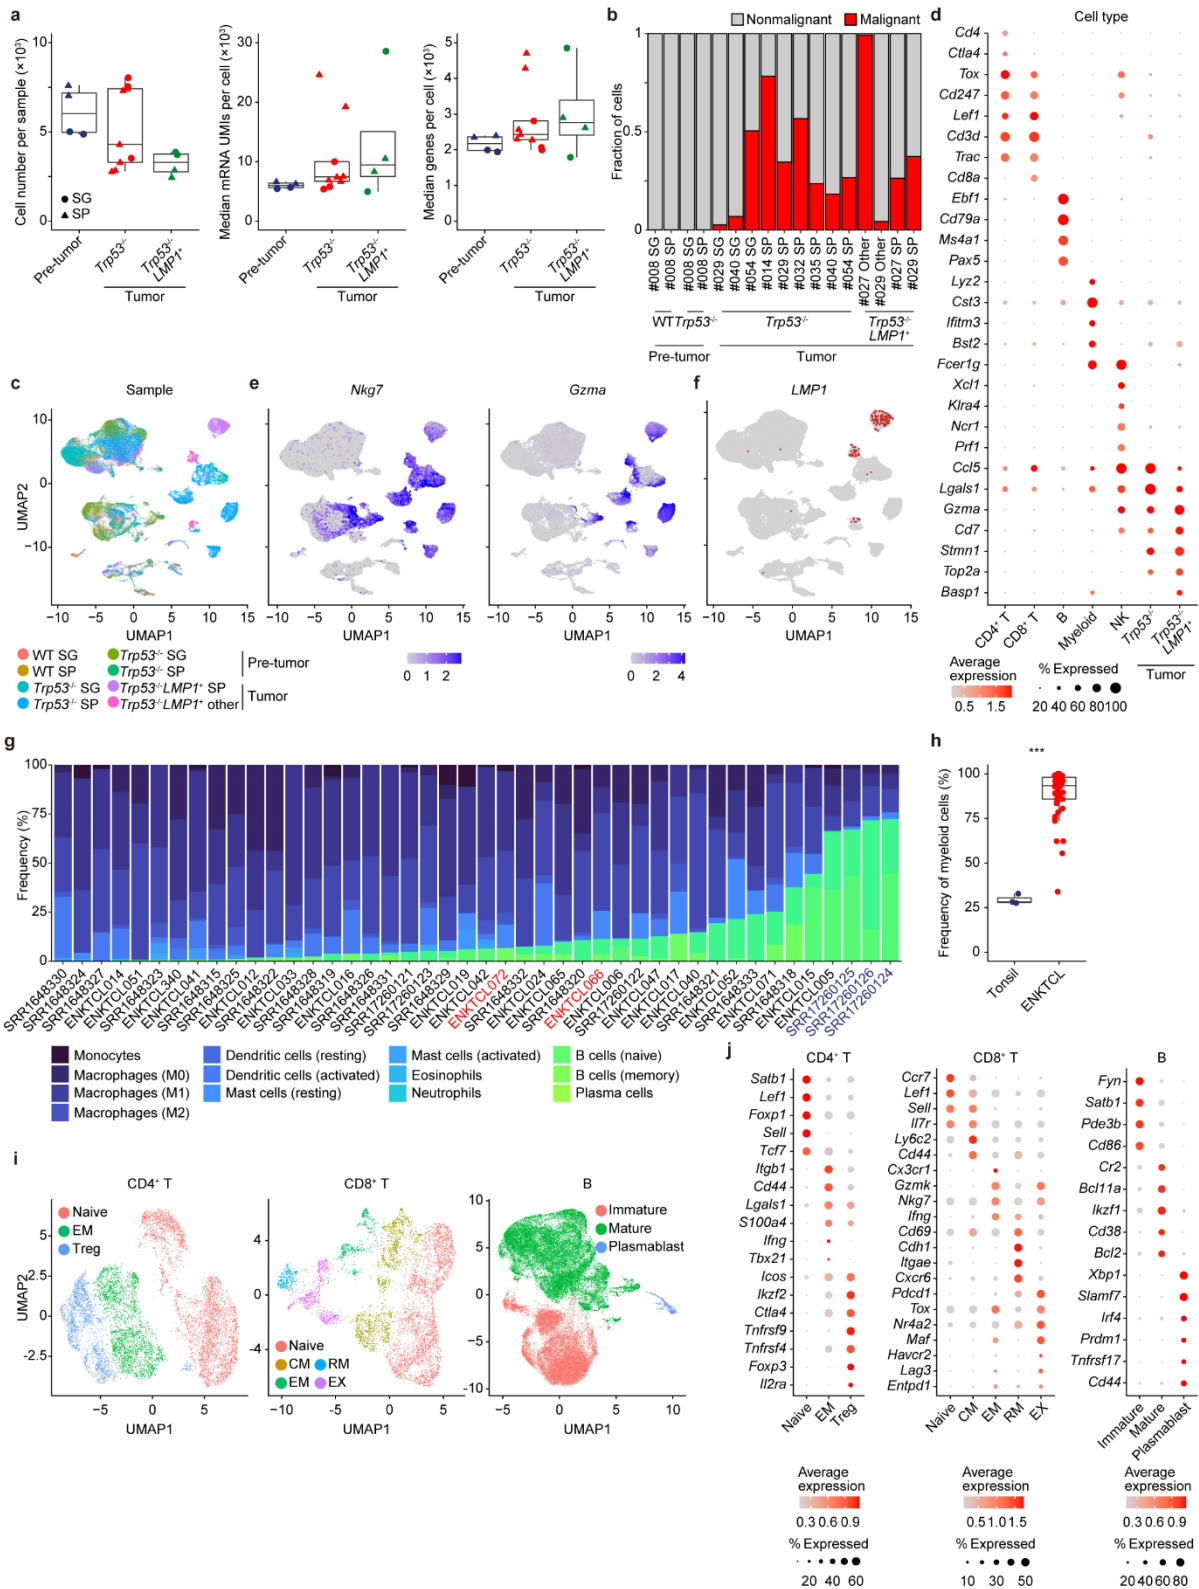

154

155 **Supplementary Fig. 5. scRNA-seq analysis of *Trp53*<sup>-/-</sup> and *Trp53*<sup>-/-</sup>LMP1<sup>+</sup> tumors.**

156 **a**, Quality control of datasets regarding analyzed cell number, median mRNA unique molecular  
 157 identifier (UMI) counts per cell, and median detected genes for each sample.

158 **b**, The fraction of malignant cells in each sample.

159 **c**, UMAP plot (same as **Fig. 4a**) colored by sample.

160 **d**, Bubble plot of representative mRNA markers for each cluster.

161 **e**, Normalized mRNA levels of *Nkg7* and *Gzma* on UMAP plots in **Fig. 4a**.

162 **f**, Distribution of *LMP1*-expressing cells on UMAP plot in **Fig. 4a**.

163 **g**, CIBERSORTx deconvolution of RNA-seq data of 41 human ENKTCL tumors and 3 normal

164 tonsils. Proportion in nonmalignant cells (after excluding T and NK cells) are shown.

165 Normal tonsils and *TP53*-mutated tumors are colored in blue and red, respectively.

166 **h**, Proportion of myeloid cells (after excluding T and NK cells) in 41 human ENKTCL tumors

167 and 3 normal tonsils. \*\*\* $P < 0.0005$ , two-sided Welch's t-test. Source data are provided as

168 a Source Data file.

169 **i**, UMAP plot of subclustering of CD4<sup>+</sup> T cells (left), CD8<sup>+</sup> T cells (middle), and B cells (right).

170 **j**, Bubble plot of representative mRNA markers for each CD4<sup>+</sup> T-cell (left), CD8<sup>+</sup> T-cell (middle),

171 and B-cell (right) subcluster.

172 **a,h**, Box plots show medians (lines), IQRs (boxes), and  $\pm 1.5 \times$  IQR (whiskers).

173

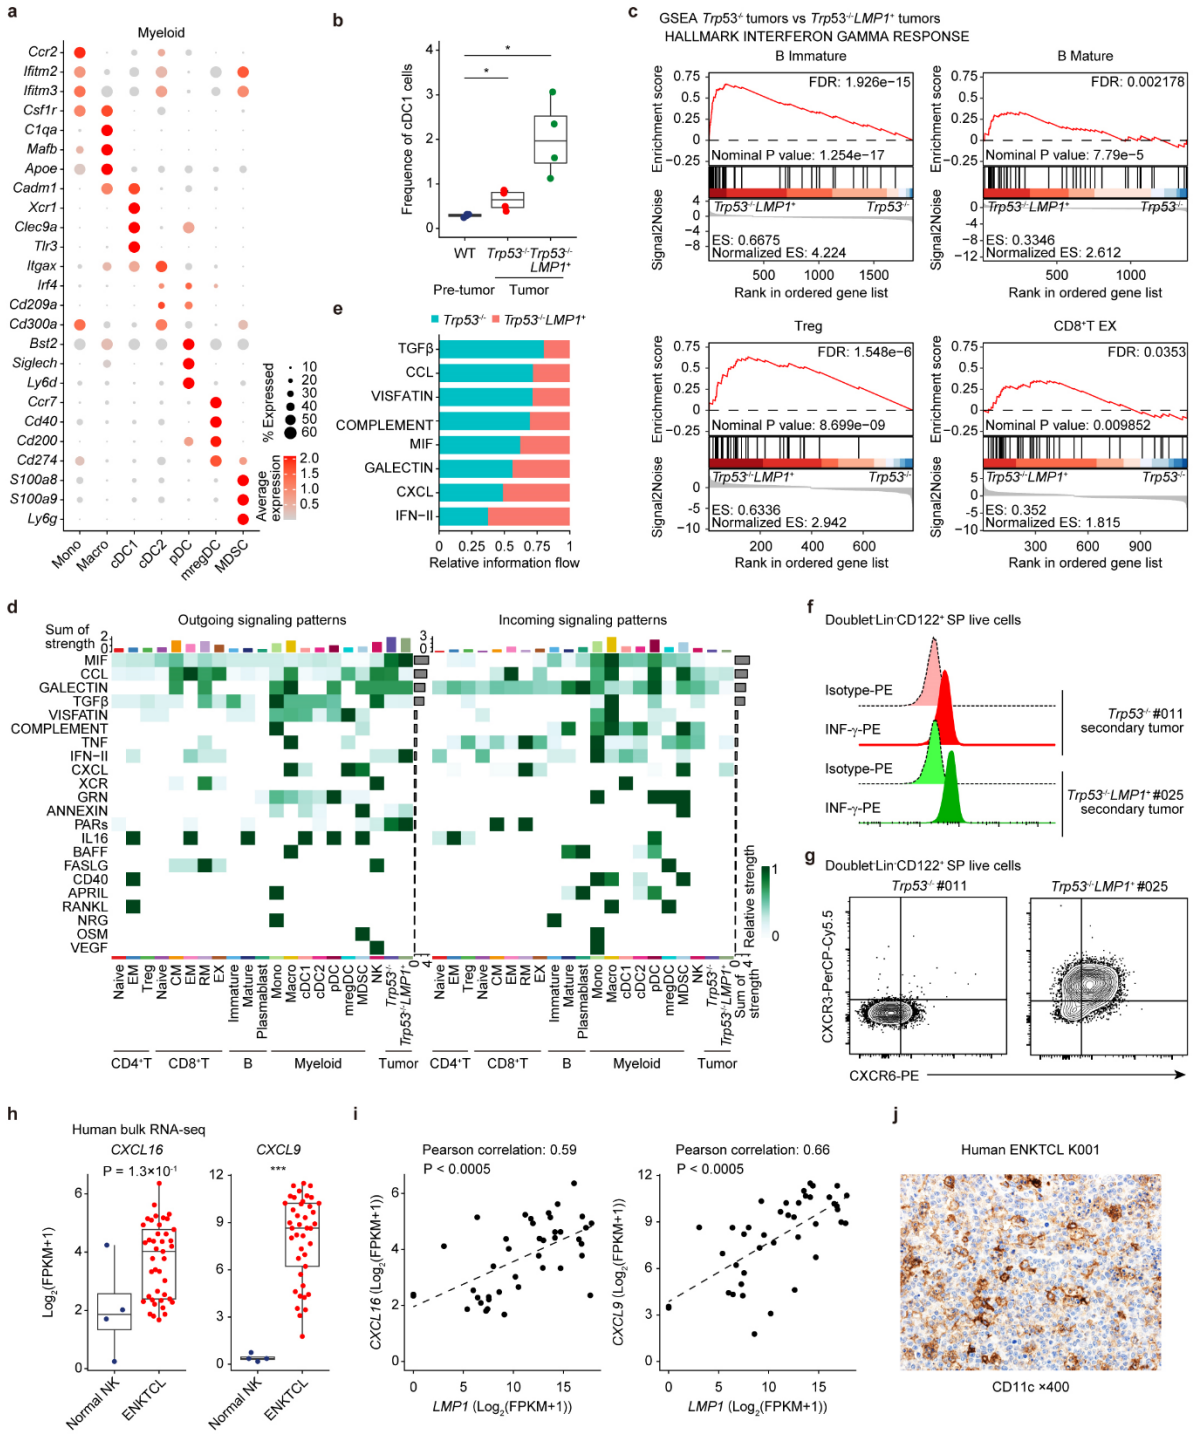

174

175

176 **Supplementary Fig. 6. Cell-cell communication networks in of *Trp53*<sup>-/-</sup> and *Trp53*<sup>-/-</sup>*LMP1*<sup>+</sup>**  
177 **tumors, Related to Figure 6.**

178 **a**, Bubble plot of representative mRNA markers for each myeloid cell subcluster.

179 **b**, Proportion of cCD1 cells in SP from WT (at 8 weeks old), *Trp53*<sup>-/-</sup> (at tumor onset), and  
180 *Trp53*<sup>-/-</sup>*LMP1*<sup>+</sup> (at tumor onset) mice (n = 4 each). Proportion in nonmalignant cells are  
181 shown for tumor-bearing mice. \*P < 0.05, two-sided Welch's t-test.

182 **c**, Significant enrichment of IFN- $\gamma$  signature in GSEA analysis of scRNA-seq data comparing  
183 B Immature, B Mature, Treg, and CD8<sup>+</sup>T EX subclusters between *Trp53*<sup>-/-</sup>*LMP1*<sup>+</sup> and *Trp53*<sup>-/-</sup>  
184 tumors.

185 **d**, Heatmap showing relative strength of 16 pathways contributing to outgoing (left) or  
186 incoming (right) signaling of each cell cluster in CellChat analysis.

187 **e**, Comparison of information flow of each signaling between *Trp53*<sup>-/-</sup> and *Trp53*<sup>-/-</sup>*LMP1*<sup>+</sup>  
188 tumors in CellChat analysis. Nine signaling pathways with information flow  $\geq 0.03$  are shown.

189 **f**, Representative histograms of IFN- $\gamma$  expressions in Lin<sup>-</sup>CD122<sup>+</sup> cells from *Trp53*<sup>-/-</sup> and *Trp53*<sup>-/-</sup>  
190 *LMP1*<sup>+</sup> tumors. Isotype controls are shown as shaded histograms.

191 **g**, Representative plots of CXCR6 and CXCR3 expressions in Lin<sup>-</sup>CD122<sup>+</sup> cells from *Trp53*<sup>-/-</sup>  
192 and *Trp53*<sup>-/-</sup>*LMP1*<sup>+</sup> tumors.

193 **h**, *CXCL16* and *CXCL9* gene expressions in human normal NK cells (n = 4) and ENKTCL  
194 tumors (n = 41) by RNA-seq. Box plots show medians (lines), IQRs (boxes), and  $\pm 1.5 \times$  IQR  
195 (whiskers). \*\*\*P < 0.0005, two-sided Welch's t-test.

196 **i**, Correlation between *LMP1* expression and *CXCL16* (left) and *CXCL9* (right) gene  
197 expressions in 41 human ENKTCL samples. Pearson correlation test.

198 **j**, Representative image of CD11c immunostaining in a human ENKTCL sample.

199 **b, h, and i**, Source data are provided as a Source Data file.

200

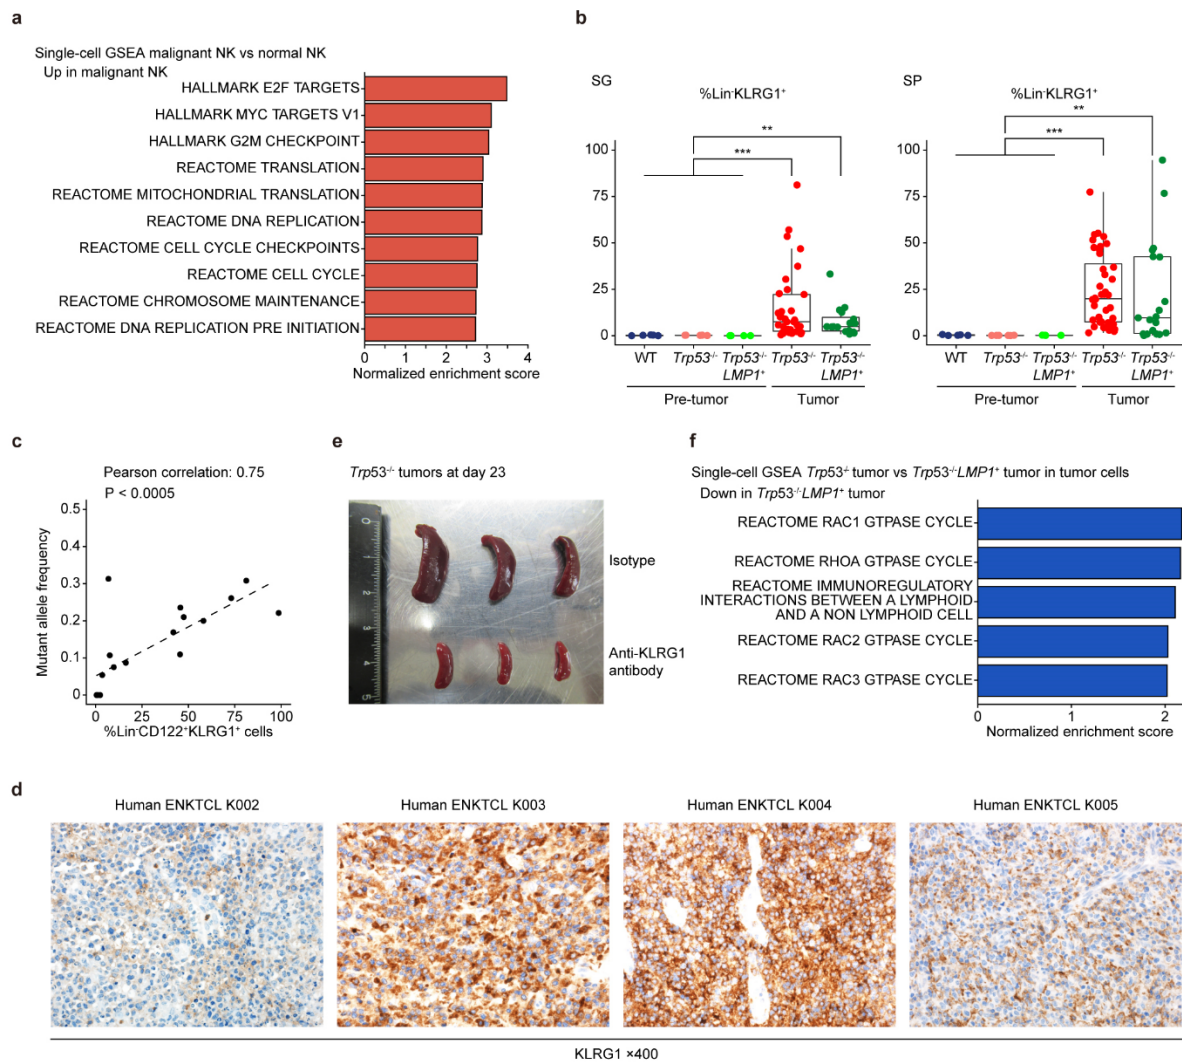

201

202 **Supplementary Fig. 7. Anti-KLRG1 antibody treatment against murine NK-cell tumors,**  
 203 **Related to Figure 7.**

204 **a**, GSEA analysis of scRNA-seq data comparing normal and malignant (*Trp53*<sup>-/-</sup> and *Trp53*<sup>-/-</sup>  
 205 *LMP1*<sup>+</sup>) NK cells. Top ten upregulated signatures are shown.

206 **b**, Proportion of Lin<sup>-</sup>KLRG1<sup>+</sup> cells in SG and SP from WT (n = 5 at 8 weeks old), *Trp53*<sup>-/-</sup> (n =  
 207 6 at 8 weeks old and n = 40 at tumor onset), and *Trp53*<sup>-/-</sup>*LMP1*<sup>+</sup> (n = 4 at 8 weeks old and n =  
 208 19 at tumor onset) mice. Box plots show medians (lines), IQRs (boxes), and ± 1.5 × IQR  
 209 (whiskers). \*\*P < 0.005, \*\*\*P < 0.0005, two-sided Welch's t-test.

210 **c**, Correlation between the Lin<sup>-</sup>CD122<sup>+</sup>KLRG1<sup>+</sup> fraction and mutant allele frequency in 18  
 211 primary tumor samples analyzed by both WES and flow cytometry. Pearson correlation test.



212 **d**, Representative images of KLRG1 immunostaining in four additional human ENKTCL  
213 samples.

214 **e**, SP size (at day 23 post-transplantation) of mice transplanted with  $5 \times 10^5$  *Trp53*<sup>-/-</sup> tumor cells  
215 and administered with anti-KLRG1 antibody or isotype control.

216 **f**, GSEA analysis of scRNA-seq data comparing *Trp53*<sup>-/-</sup> and *Trp53*<sup>-/-</sup>*LMP1*<sup>+</sup> malignant NK cells.  
217 Top five downregulated signatures in *Trp53*<sup>-/-</sup>*LMP1*<sup>+</sup> malignant NK cells are shown.

218 **a, f**, Signatures with FDR < 0.25 are considered significant.

219 **b, c**, Source data are provided as a Source Data file.

220

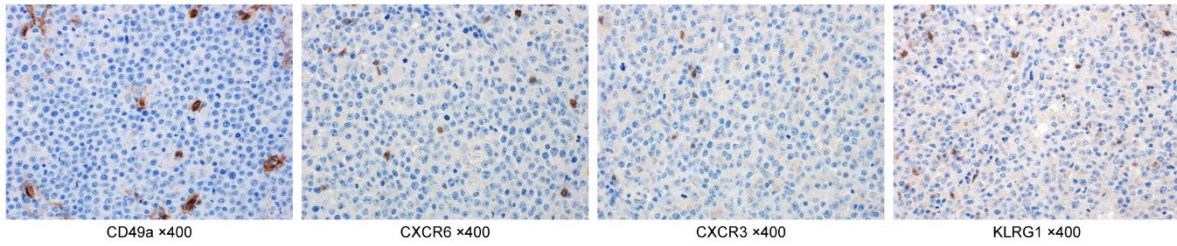

221

222 **Supplementary Fig. 8. Validation of the specificity of the antibodies used in**  
223 **Immunohistochemical analysis.**

224 Representative images of CD49a, CXCR6, CXCR3, and KLRG1 immunostaining in a human  
225 diffuse large B-cell lymphoma (DLBCL) sample.

226

227

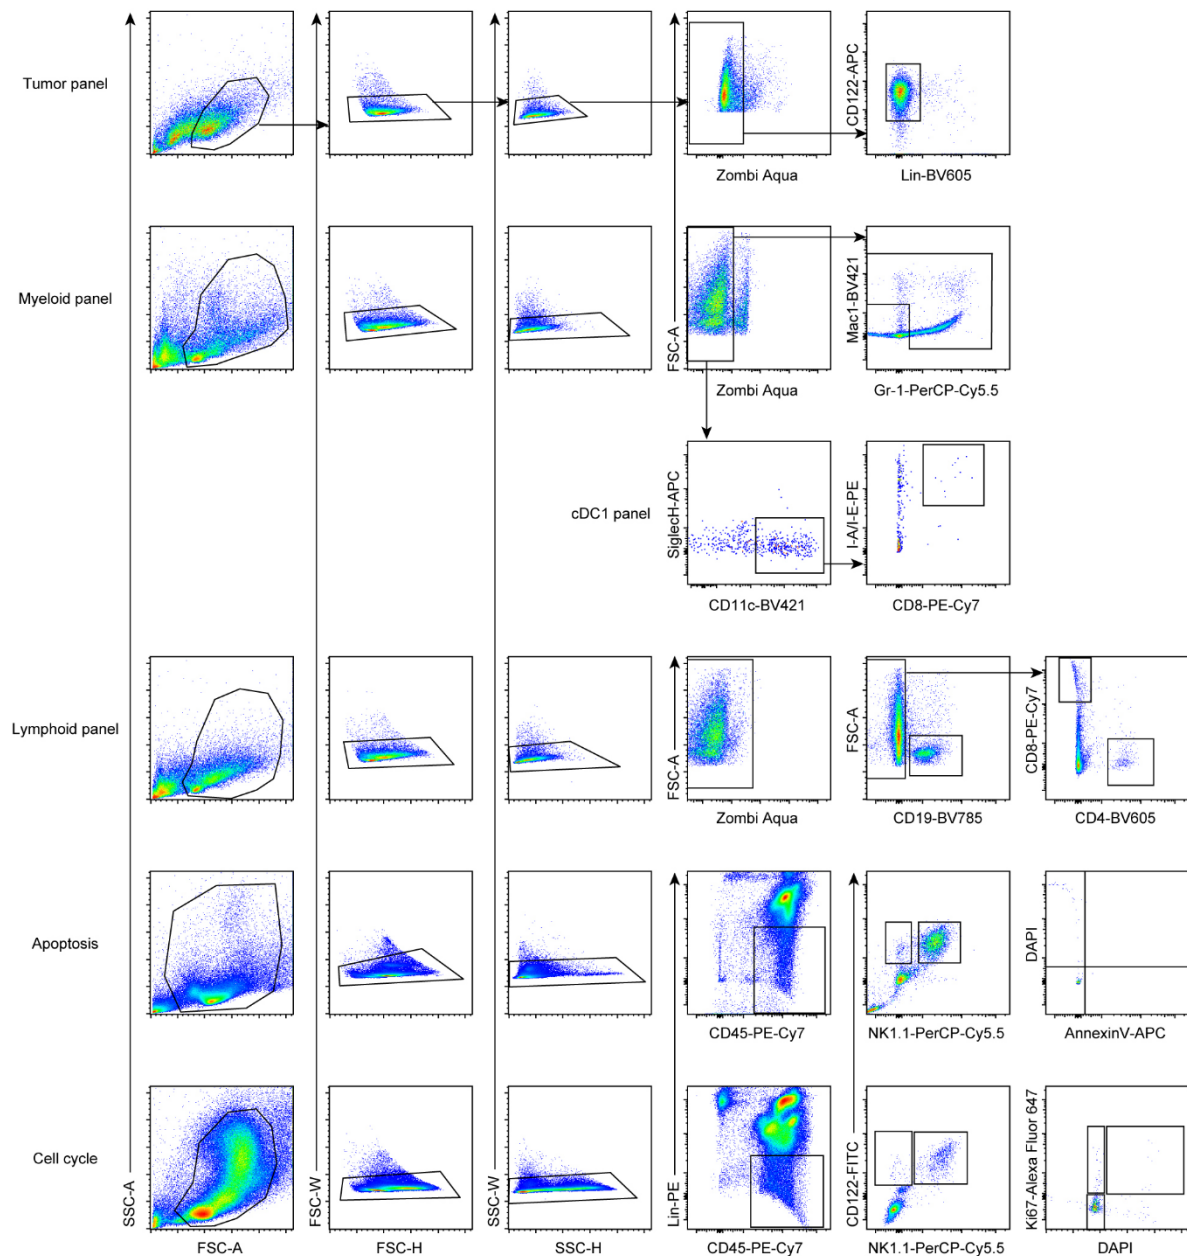

228

229 **Supplementary Fig. 9. Gating strategies of flow cytometric analyses.**

230 Gating strategies of flow cytometric analyses of tumor cells, myeloid cells, lymphoid cells,  
 231 apoptosis status, and cell cycle status. The tumor panel was used in **Fig. 1e, 1f, 1g, 2a, 2e,**  
 232 **5e, 5g, 6b, Supplementary Fig. 1d, Supplementary Fig. 1e, Supplementary Fig. 2c,**  
 233 **Supplementary Fig. 4b, Supplementary Fig. 6f, Supplementary Fig. 6g, and**  
 234 **Supplementary Fig. 7b.** The myeloid panel was used in **Fig. 4d and Supplementary Fig.**  
 235 **2b.** The cDC1 panel was used in **Supplementary Fig. 6b.** The lymphoid panel was used

236 in **Fig. 4d and Supplementary Fig. 2b**. The apoptosis panel was used in **Fig. S2e**. The  
237 cell cycle panel was used in **Fig. 2b and S2d**.

238

Related to Supplementary Fig. 1a

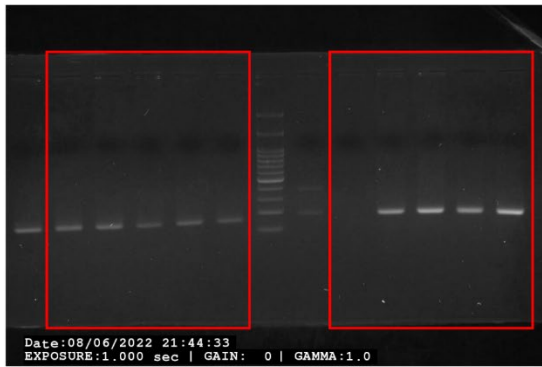

239 **Supplementary Fig. 10. Uncropped scan of the electrophoresis gel image.**

240 Uncropped scan of the electrophoresis gel image from Supplementary Fig. 1a.

241

242 **Supplementary Reference**

- 243 1 Ito, Y. *et al.* Comprehensive genetic profiling reveals frequent alterations of driver  
244 genes on the X chromosome in extranodal NK/T-cell lymphoma. *Cancer Res* (2024).  
245 <https://doi.org/10.1158/0008-5472.Can-24-0132>  
246
